# Supplementary material for: lncRNAs as Novel Indicators of Patients' Prognosis in Stage I Epithelial Ovarian Cancer: A Retrospective and Multicentric Study
Source: Oxford University Press journal article supplement (doi:10.1158/1078-0432.ccr-16-1402), 2016-11-09
Supplement: 10780432ccr161402-sup-167270_2_supp_3715244_qqysp5.docx [file 10780432ccr161402-sup-167270_2_supp_3715244_qqysp5.docx]

Supplementary Results to the paper entitled

**lncRNAs as novel indicators of patients’ prognosis in stage I epithelial ovarian cancer: a retrospective and multicentric study**

Paolo Martini°, Lara Paracchini°, Giulia Caratti2, Maurizia Mello-Grand3, Robert Fruscio4, Luca Beltrame2, Enrica Calura1, Gabriele Sales1, Antonella Ravaggi5, Eliana Bignotti5, Franco E. Odicino6, Enrico Sartori6, Patrizia Perego7, Dionyssios Katsaros8, Ilaria Craparotta2, Giovanna Chiorino3, Stefano Cagnin1,9, Laura Mannarino2, Lorenzo Ceppi4, Costantino Mangioni10, Chiara Ghimenti3, Maurizio D’Incalci2*, Sergio Marchini2$, Chiara Romualdi1$

**Section 1**

**Detailed description of the cohort of patients used and overall design.**

In this section we describe in details the cohort of patients enrolled in this study. We already used partially or the whole cohort in other studies demonstrating that this cohort is unique and perfectly suited for the proposed goals (1–3). Figure S1.1 summarizes the study overall design. The REMARK guidelines and relative dissertations are summarized Table S1.1.

**Figure S1.1. Overall analysis schema.** Using a multidisciplinary approach, we have identified a non coding RNAs prognostic signature and the molecular pathways involved. The upper part of the figure describes how the lncRNA signature has been identified and validated in a cohort of 202 snap-frozen tumor biopsies gathered together from three independent tumor tissue collections. The lower part of the figure describes the functional characterization of the *PVT1* and *lnc-SOX4-1* genes. The results are two regulatory circuits that highly depend on lncRNA expression levels.

| **REMARK FORM: Item to be reported** | | |  |
| --- | --- | --- | --- |
| **INTRODUCTION** | | |  |
| 1 | State the marker examined, the study objectives, and any pre-specified hypotheses. | | Introduction, especially last paragraph. |
| **MATERIALS AND METHODS** | | |  |
| *Patients* | | |  |
| 2 | Describe the characteristics (e.g., disease stage or co-morbidities) of the study patients, including their source and inclusion and exclusion criteria. | | Material and Methods – “Tissue Sample collection and experimental design”, Table 1 and Supplementary Section 1 |
| 3 | Describe treatments received and how chosen (e.g., randomized or rule-based). | | Material and Methods – “Tissue Sample collection and experimental design” and Supplementary Section 1 |
| *Specimen characteristics* | | |  |
| 4 | Describe type of biological material used (including control samples) and methods of preservation and storage. | | Material and Methods – “Tissue Sample collection and experimental design” and Supplementary Section 1 |
| *Assay methods* | | |  |
| 5 | Specify the assay method used and provide (or reference) a detailed protocol, including specific reagents or kits used, quality control procedures, reproducibility assessments, quantitation methods, and scoring and reporting protocols. Specify whether and how assays were performed blinded to the study endpoint. | | Supplementary Section 2 |
| *Study design* | | |  |
| 6 | State the method of case selection, including whether prospective or retrospective and whether stratification or matching (e.g., by stage of disease or age) was used. Specify the time period from which cases were taken, the end of the follow-up period, and the median follow-up time. | | Material and Methods – “Tissue Sample collection and experimental design”, Table 1 and Supplementary Section 1 |
| 7 | Precisely define all clinical endpoints examined. | | Material and Methods - “Tissue Sample collection and experimental design” and Supplementary Section 1 |
| 8 | List all candidate variables initially examined or considered for inclusion in models. | | Material and Methods - “Tissue Sample collection and experimental design” and Supplementary Section 1 |
| 9 | Give rationale for sample size; if the study was designed to detect a specified effect size, give the target power and effect size. | | Material and Methods - “Tissue Sample collection and experimental design” |
| *Statistical analysis methods* | | |  |
| 10 | Specify all statistical methods, including details of any variable selection procedures and other model-building issues, how model assumptions were verified, and how missing data were handled. | | Material and Methods - Statistical analysis |
| 11 | Clarify how marker values were handled in the analyses; if relevant, describe methods used for cutpoint determination. | | Material and Methods |
| **RESULTS** | | |  |
| *Data* | | |  |
| 12 | | Describe the flow of patients through the study, including the number of patients included in each stage of the analysis (a diagram may be helpful) and reasons for dropout. Specifically, both overall and for each subgroup extensively examined report the numbers of patients and the number of events. | Results - Patients characteristic and Supplementary Section 1 |
| 13 | | Report distributions of basic demographic characteristics (at least age and sex), standard (disease-specific) prognostic variables, and tumor marker, including numbers of missing values. | Results - Patients characteristic and Supplementary Section 1 |
| *Analysis and presentation* | | |  |
| 14 | Show the relation of the marker to standard prognostic variables. | | Results and Supplementary Section 1 |
| 15 | Present univariate analyses showing the relation between the marker and outcome, with the estimated effect (e.g., hazard ratio and survival probability). Preferably provide similar analyses for all other variables being analyzed. For the effect of a tumor marker on a time-to-event outcome, a Kaplan-Meier plot is recommended. | | Results and Supplementary Section 1,2 |
| 16 | For key multivariable analyses, report estimated effects (e.g., hazard ratio) with confidence intervals for the marker and, at least for the final model, all other variables in the model. | | Results and Supplementary Section 2 |
| 17 | Among reported results, provide estimated effects with confidence intervals from an analysis in which the marker and standard prognostic variables are included, regardless of their statistical significance. | | Results and Supplementary Section 2 |
| 18 | If done, report results of further investigations, such as checking assumptions, sensitivity analyses, and internal validation. | | Results and Supplementary Section 2 |
| **DISCUSSION** | | |  |
| 19 | Interpret the results in the context of the pre-specified hypotheses and other relevant studies; include a discussion of limitations of the study. | | Discussion |
| 20 | Discuss implications for future research and clinical value. | | Statement of translational relevance and Discussion |

**Table S1.1** REMARK form.

**Additional Results**

**Survival models on clinical variables.**

We performed log-rank test using a) grades, b) chemotherapy treatment, c) FIGO substages and d) histotypes as clinical variables in an OS and a PFS model. Kaplan-Meier curves for all the clinical variables are reported in figure S1.2. This analysis shows, as expected, that grade and platinum based chemotherapy are proxy of patients’ relapse but not of the overall survival of the patients.

Figure S1.2 a) Kaplan Meier curves of patients divided by tumor grades (OS and PFS model). The table below summarizes the models used.

**Overall Survival of tumor grades**

n = 202 , 0 observation deleted due to missingness.

|  | N | Observed | Expected | (O-E)^2/E | (O-E)^2/V |
| --- | --- | --- | --- | --- | --- |
| G1 | 55 | 9 | 11.532 | 0.556 | 0.813 |
| G2 | 63 | 8 | 11.97 | 1.317 | 1.951 |
| G3 | 84 | 20 | 13.498 | 3.132 | 4.956 |

Chisq = 5 on 2 degrees of freedom, p = 0.081

**Progression Free Survival of tumor grades**

n = 202 , 0 observation deleted due to missingness.

|  | N | Observed | Expected | (O-E)^2/E | (O-E)^2/V |
| --- | --- | --- | --- | --- | --- |
| G1 | 55 | 10 | 14.492 | 1.392 | 2.026 |
| G2 | 63 | 11 | 15.409 | 1.261 | 1.884 |
| G3 | 84 | 26 | 17.099 | 4.633 | 7.31 |

Chisq = 7.3 on 2 degrees of freedom, p = 0.0258

Figure S1.2 b) Kaplan Meier curves of patients divided in patients who received chemotherapy (Yes) and patients who did not undergo chemotherapy (No). The table below summarizes the models used.

**Overall Survival of chemotherapeutic treatment.**

N = 202 , 23 observation deleted due to missingness.

|  | N | Observed | Expected | (O-E)^2/E | (O-E)^2/V |
| --- | --- | --- | --- | --- | --- |
| No | 43 | 9 | 8.881 | 0.002 | 0.002 |
| Yes | 136 | 21 | 21.119 | 0.001 | 0.002 |

Chisq = 0 on 1 degrees of freedom, p = 0.962

**Progression Free Survival of chemotherapeutic treatment**

n= 202 , 23 observation deleted due to missingness.

|  | N | Observed | Expected | (O-E)^2/E | (O-E)^2/V |
| --- | --- | --- | --- | --- | --- |
| No | 43 | 5 | 11.886 | 3.989 | 5.742 |
| Yes | 136 | 35 | 28.114 | 1.687 | 5.742 |

Chisq = 5.7 on 1 degrees of freedom, p = 0.0166

Figure S1.2 c) Kaplan Meier curves of patients divided in FIGO substages. The table below summarizes the models used.

**Overall Survival of FIGO substages**

N = 202 , 0 observation deleted due to missingness.

|  | N | Observed | Expected | (O-E)^2/E | (O-E)^2/V |
| --- | --- | --- | --- | --- | --- |
| a | 69 | 10 | 14.228 | 1.256 | 2.058 |
| b | 15 | 3 | 2.52 | 0.092 | 0.099 |
| c | 118 | 24 | 20.252 | 0.693 | 1.541 |

Chisq= 2.1 on 2 degrees of freedom, p = 0.357

**Progression Free Survival of FIGO substages**

N = 202 , 0 observation deleted due to missingness.

|  | N | Observed | Expected | (O-E)^2/E | (O-E)^2/V |
| --- | --- | --- | --- | --- | --- |
| a | 69 | 11 | 18.031 | 2.742 | 4.479 |
| b | 15 | 3 | 3.255 | 0.02 | 0.021 |
| c | 118 | 33 | 25.714 | 2.064 | 4.58 |

Chisq= 4.9 on 2 degrees of freedom, p = 0.0883

Figure S1.2 d) Kaplan Meier curves of patients divided in histotypes. The table below summarizes the models used.

**Overall Survival of histotypes**

N = 202, 0 observation deleted due to missingness.

|  | N | Observed | Expected | (O-E)^2/E | (O-E)^2/V |
| --- | --- | --- | --- | --- | --- |
| Clear cell | 37 | 8 | 5.466 | 1.174 | 1.384 |
| Endometrioid | 74 | 9 | 12.749 | 1.102 | 1.689 |
| Mucinous | 35 | 9 | 7.505 | 0.298 | 0.376 |
| SH (Serous High grade) | 42 | 10 | 7.92 | 0.546 | 0.696 |
| SL (Serous Low grade) | 14 | 1 | 3.36 | 1.658 | 1.833 |

Chisq= 4.8 on 4 degrees of freedom, p = 0.31

**Progression Free Survival of histotypes**

N = 202, 0 observation deleted due to missingness.

|  | N | Observed | Expected | (O-E)^2/E | (O-E)^2/V |
| --- | --- | --- | --- | --- | --- |
| Clear cell | 37 | 8 | 6.898 | 0.176 | 0.208 |
| Endometrioid | 74 | 15 | 15.975 | 0.059 | 0.091 |
| Mucinous | 35 | 5 | 9.639 | 2.233 | 2.831 |
| SH (Serous High grade) | 42 | 16 | 10.331 | 3.111 | 4.005 |
| SL (Serous Low grade) | 14 | 3 | 4.156 | 0.322 | 0.355 |

Chisq= 5.9 on 4 degrees of freedom, p = 0.203

Figure S1 e) Kaplan Meier curves of patients divided in types. The table below summarizes the models used.

**Overall Survival**

n= 202 , 0 observation deleted due to missingness.

|  | N | Observed | Expected | (O-E)^2/E | (O-E)^2/V |
| --- | --- | --- | --- | --- | --- |
| T I | 141 | 25 | 25.706 | 0.019 | 0.064 |
| T II | 61 | 12 | 11.294 | 0.044 | 0.064 |

Chisq= 0.1 on 1 degrees of freedom, p = 0.801

**Progression Free Survival**

n= 202 , 0 observation deleted due to missingness.

|  | N | Observed | Expected | (O-E)^2/E | (O-E)^2/V |
| --- | --- | --- | --- | --- | --- |
| T I | 141 | 27 | 32.474 | 0.923 | 2.991 |
| T II | 61 | 20 | 14.526 | 2.063 | 2.991 |

Chisq= 3 on 1 degrees of freedom, p = 0.0837

**­­**

**Section 2**

**lncRNAs, miRNAs and mRNAs profiling and data analysis**

In this section we provide additional details on the microarray experiments and their analysis as well as a detailed description of RT-qPCR experiments.

**Additional Materials and Methods**

**lncRNA, miRNA and mRNA expression profile with microarray**

30 mg of tumor tissue was homogenized using the Tissue Lyser LT (Qiagen, Hilden, Germany) and total RNA purified using miRNeasy mini kit (Qiagen) using an automatic extractor (Qiacube, Qiagen). RNA quality and concentration were evaluated by QIAexpert system (Qiagen). cRNA Cy3-labelling, hybridization and washing were performed using a commercial kit (Agilent Technologies, Palo Alto, USA) and the lincRNA profile was generated using G4851A Human Gene Expression Microarray Kit (Agilent Technologies). Arrays were scanned by a laser confocal scanner (G2565B, Agilent Technologies) and the fluorescence intensity evaluated by Feature Extraction software, version 11 (Agilent Technologies).

**Gene expression data analysis**

Patients were profiled with Agilent platform G4851A that contains 60k probes for 27,958 genes/transcripts and 7,419 lncRNAs. The row data are available at Array Express E-MTAB-1814. Probes with more than 40% of missing values (geneIsWellAboveBg Agilent quality flag) on the whole cohort of patients were removed and excluded from further analysis. After filtering we obtained 19,022 probes for genes and 6,031 for lncRNAs. The expression matrix was normalized with quantiles method *(4)*.

To have the most up to date picture of lncRNA, we performed an additional annotation of the microarray probes using LNCipedia database (http://www.lncipedia.org/) version 1.2, entrezGene and Ensembl version 75 *(5,6)*. Probes that match neither LNCipedia nor entrezGenes were excluded from network and pathway analysis. Probes matching multiple lncRNAs or multiple entrezGene were retained and evaluated separately when needed. When a probe was associated both to LNCipedia and to entrezGene, we kept LNCipedia annotation. The full list of probe annotations and names is available upon request.

To further complete the transcriptional picture of EOC patients, we integrated mRNAs and lncRNAs expression with miRNAs expression profiles of matched patients (Array Express E-MTAB-1067). Raw data were preprocessed according to *(7)*.

Cluster analyses have been performed using Euclidean distance and complete linkage in R language environment.

Sam-Paired test and Wilcoxon test (two-sided) was performed using TMEV and R language respectively.

**RT-qPCR**

1. lncRNAs expression levels were validated by RT-qPCR following the protocol previously published *(8,9)*. Briefly, 1000ng of purified total RNA were reverse transcribed into cDNA (High Capacity cDNA Reverse Transcription kit, Applied Biosysten, Walthman, USA). Reverse transcription real-time PCR (RT-qPCR) was performed on an Applied Biosystem 7900HT instrument using the QuantiFast Sybr Green Protocol (Qiagen). The PCR reactions were prepared using an automated pipetting system (epMotion 5075 Eppendorf) and each sample was run in triplicate. Data were normalized on the expression levels of five independent housekeeping genes. The primer sequences for housekeeping genes and the ten selected lncRNAs were designed using Primer3 software and are reported in Table S2.1.
2. miRNA 200c-3p expression analysis was performed using commercially available kit as previously described *(3)*.

Wilcoxon test, univariate and multivariate survival analyses were used to validate expression results.

a)

| **lncipedia NAME** | **BroadName** | **Primers** | **Sequence** | **Ta (°C)** | **Amplicon length (bp)** |
| --- | --- | --- | --- | --- | --- |
| *lnc-VSTM2B-9* | lincRNA:chr19:28284957-28297172_F | Fw | TTCCCGCACAATCTCCTAAC | 60 | 62 |
| Rv | CCAGACCTCTCCAAATCCAA |
| *PVT1* | TCONS_00015353 | Fw | GCATGGAGCTTCGTTCAAGT | 60 | 75 |
| Rv | AGCGTTATTCCCCAGACCAC |
| *lnc-SERTAD2-3* | TCONS_00003305 | Fw | ATGTGGAGGTGAGGGATGAG | 60 | 75 |
| Rv | AGCACAATTCCTTCCTGTGG |
| *lnc-SOX4-1* | lincRNA:chr6:22020628-22111150_F | Fw | TCCAAGTGTGACTGCCAAGA | 60 | 100 |
| Rv | CATTTCCTCTGGGTTTTCCA |
| *lnc-ST3GAL1-1* | TCONS_00015178 | Fw | TTACCTCCCATGCTCTCCAC | 60 | 94 |
| Rv | GGGCCTTTGTGAAAATGTGT |
| *lnc-HRCT1-1* | NR_024283 | Fw | TCCTTCCCCTCCAGTAACCT | 60 | 94 |
| Rv | GGCTGTCCCAATAACAAGGA |
| *lnc-LRIG2-4* | lincRNA:chr1:113510889-113511596_F | Fw | CATGCAACTTGCCACCATAG | 60 | 80 |
| Rv | GCTCTTCTTTCCCGACTCGT |
| *lnc-RAB40AL-2* | lincRNA:chrX:102081895-102094900_F | Fw | TCTCCCTGTGCAACTCTTCA | 60 | 79 |
| Rv | GTCCCAGATCCTCAGAACGA |
| *lnc-PHF15-2* | TCONS_00009513 | Fw | TAGCCTTCTGAGACCGCACT | 60 | 87 |
| Rv | GAGTGAGCCCAGAAAAGGTG |
| *lnc-ABCB4-1 var 1* | NR_015381 | Fw | TGCCAAATGAGCTGTCCTAA | 60 | 87 |
| Rv | GCCTTCTAGATCCTGGGTCA |
| *lnc-ABCB4-1 var 2* | NR_015381 | Fw | GCTGGCAGGTCTGAGTAACC | 60 | 70 |
| Rv | TGCATTGGTTTTAGCTCAGGT |

b)

| **­­Gene Name** | **RefSeq Name** | **Primers** | **Sequence** | **Ta (°C)** | **Amplicon length (bp)** |
| --- | --- | --- | --- | --- | --- |
| *G6PD* | NM_000402 | Fw | TGCCCCCGACCGTCTAC | 60 | 76 |
| Rv | ATGCGGTTCCAGCCTATCTG |
| *GAPDH* | NM_001256799 | Fw | AGGTCGGAGTCAACGGATTT | 60 | 230 |
| Rv | ATCTCGCTCCTGGAAGATGG |
| *PPIA* | NM_021130.3 | Fw | GCGTCTCCTTTGAGCTGTTT | 60 | 79 |
| Rv | GCGTCTCCTTTGAGCTGTTT |
| *HPRT1* | NM_000194.2 | Fw | TGAATACTTCAGGGATTTGAATCAT | 60 | 76 |
| Rv | CTCATCTTAGGCTTTGTATTTTGC |
| *ACTB* | NM_001101.3 | Fw | CAGAGCCTCGCCTTTGC | 60 | 65 |
| Rv | TCATCATCCATGGTGAGCTG |

Table S2.1. RT-qPCR primers used for lncRNAs (a) and for reference genes (b).

**Additional Results**

**LncRNA and mRNA expression analysis**

After annotation and filtering steps, we were able to retrieve the expression of 5156 lncRNAs (6031 probes out of 10,362 originally designed for ncRNAs) and 15391 mRNA (19022 probes out of 32043 designed for protein coding genes). Given to platform redundancy there may be more than one probe for each molecular element. On average, we had 1.17 probes per lncRNAs (with a max of 23) and 1.24 probes per protein coding genes (with a max of 16). Given the presence of multiple lncRNA isoforms and the possibility that different isoforms may act differently, we decided to analyze independently multiple probes of the same lncRNA/gene.

**Survival analysis on the training set (microarray).**

We performed survival analysis to evaluate the association of lncRNA expression with patients’ survival. We used log-rank test as univariate models for OS and PFS and a Cox regression as multivariate model for OS and PFS using grades and histotypes as covariates. We do not take into consideration the chemotherapy variable due to the presence of many missing values. This together with the noisy nature of microarray (noisier than RT-qPCR) data reduces statistical power. On the other hand, we do include chemotherapy variable in training and validation sets during orthogonal validation by RT-qPCR technology

Results for lncRNAs that were significant in all tests are summarized in Table S2.2 while Kaplan-Meier curves for the ten lncRNAs selected to be validated in RT-qPCR are reported in figure S2.3.

| lncRNAs | Overall Survival | | | Progression Free Survival | | |
| --- | --- | --- | --- | --- | --- | --- |
| **Univariate analysis** | **Multivariate analysis** | | **Univariate analysis** | **Multivariate analysis** | |
| **p** | **HR**  **high vs low (95% CI)** | **p** | **p** | **HR**  **high vs low (95% CI)** | **p** |
| *lnc-ABCB4-1* (A_33_P3250963) | 0.0555 | 0.63  (0.36-1.12) | 0.1137 | 0.00806 | 0.59  (0.35-0.99) | 0.0455 |
| *lnc-AC026150.9.1-1 lnc-RP11-632K20.1.1-1* (A_33_P3315475) | 0.0439 | 2.87 (1.31-6.28) | 0.0085 | 0.0829 | 2.31 (1.18-4.54) | 0.015 |
| *lnc-ACOX3-1* (A_19_P00318718) | 0.284 | 0.67 (0.4-1.15) | 0.1468 | 0.0289 | 0.58 (0.35-0.96) | 0.0332 |
| *lnc-ACOX3-1* (A_19_P00318719) | 0.289 | 0.71 (0.42-1.2) | 0.1979 | 0.0289 | 0.59 (0.36-0.97) | 0.0385 |
| *lnc-APBA2-1*  *lnc-NIPA1-1*  (A_33_P3317558) | 0.0124 | 2.68  (1.14-6.34) | 0.0244 | 0.078 | 2.5  (1.17-5.33) | 0.0182 |
| *lnc-CHD9-4* (A_33_P3538104) | 0.0101 | 0.07 (0-0.97) | 0.0473 | 0.0535 | 0.21 (0.02-2.04) | 0.1769 |
| *lnc-COL20A1-1* (A_33_P3382919) | 0.0182 | 1.36 (1.02-1.81) | 0.0386 | 0.257 | 1.17 (0.87-1.58) | 0.308 |
| *lnc-CRYBA4-1* (A_19_P00315524) | 0.0474 | 0.66 (0.44-0.99) | 0.0441 | 0.13 | 0.8 (0.57-1.13) | 0.2023 |
| *lnc-HRCT1-1*  (A_33_P3424132) | 0.00656 | 3.39 (1.11-10.35) | **0.0316** | 0.0678 | 2.99 (1.1-8.12) | **0.0318** |
| *lnc-KB-1507C5.2.1-3* (A_33_P3728698) | 0.0426 | 2.24 (1-5.01) | 0.0494 | 0.468 | 1.51 (0.74-3.11) | 0.2585 |
| *lnc-LRIG2-4* (A_19_P00321183) | 0.00892 | 2.54 (1.13-5.72) | **0.0248** | 0.00544 | 2.2 (1.05-4.61) | **0.0361** |
| *lnc-MACROD1-1* (A_19_P00810982) | 0.0748 | 2.98 (1.19-7.43) | 0.0194 | 0.023 | 3.3 (1.46-7.45) | 0.0042 |
| *PVT1*  (A_19_P00316753) | 0.0259 | 1.8 (1.01-3.21) | **0.0473** | 0.461 | 1.25 (0.72-2.16) | **0.433** |
| *PVT1*  (A_19_P00317872) | 0.00563 | 1.62 (1.01-2.59) | **0.0431** | 0.0161 | 1.35 (0.87-2.09) | **0.1873** |
| *PVT1*  (A_33_P3248227) | 0.000851 | 2.11 (1.44-3.07) | **1e-04** | 0.00151 | 1.83 (1.25-2.69) | **0.002** |
| *lnc-PHF15-2* (A_19_P00318780) | 0.0394 | 0.04 (0-0.58) | **0.0188** | 0.0307 | 0.04 (0-0.42) | **0.0073** |
| *lnc-POM121L4P-1* (A_23_P166336) | 0.049 | 0.43 (0.24-0.77) | 0.005 | 0.404 | 0.7 (0.44-1.11) | 0.1306 |
| *lnc-RAB40AL-2* (A_19_P00809728) | 0.0196 | 1.44 (1.07-1.93) | **0.0154** | 0.0778 | 1.26 (0.95-1.68) | **0.1034** |
| *lnc-RALA-1*  (A_24_P583225) | 0.0815 | 1.85 (0.92-3.71) | 0.0855 | 0.0141 | 2.03 (1.07-3.86) | 0.0297 |
| *lnc-RASL11B-2* (A_24_P902052) | 0.0716 | 0.62 (0.4-0.95) | 0.0275 | 0.0208 | 0.61 (0.4-0.92) | 0.0195 |
| *lnc-SERTAD2-3* (A_19_P00800206) | 0.00387 | 1.27 (1.04-1.55) | **0.0171** | 0.0466 | 1.16 (0.98-1.37) | **0.079** |
| *lnc-SOX4-1*  (A_19_P00809119) | 0.00344 | 1.3 (1.06-1.59) | **0.0105** | 0.0441 | 1.16 (0.99-1.37) | **0.0749** |
| *lnc-ST3GAL1-1* (A_19_P00807046) | 0.0182 | 2.74 (0.84-8.98) | **0.0951** | 0.00826 | 2.94 (1.02-8.45) | **0.0459** |
| *lnc-ST8SIA4-4*  (A_32_P39003) | 0.0711 | 1.62 (0.97-2.69) | 0.0646 | 0.0216 | 1.7 (1.07-2.69) | 0.0253 |
| *lnc-UBLCP1-3* (A_19_P00320570) | 0.0189 | 27.49 (2.46-306.94) | 0.0071 | 0.0193 | 8.04 (1.07-60.59) | 0.0431 |
| *lnc-VSTM2B-9* (A_19_P00320371) | 0.0128 | 0.01 (0-0.29) | **0.0057** | 0.0286 | 0.07 (0.01-0.64) | **0.0189** |

Table S2.2. lncRNA associated to OS or PFS. The table summarizes the list of 26 probes for 25 candidate lncRNAs whose expression values obtained by microarray analysis in the training set were significant (p value <=0.05) in both univariate and multivariate model for their association to either OS or PFS. In bold the lncRNAs that were further selected for downstream independent validations.

Figure S2.1 KM curves for the 10 selected lncRNAs. KM curves for OS and PFS were made based on microarray expression profiles. The figure continues in the next page.

Continue Figure S2.1 KM curves for 10 selected lncRNAs. KM curves for OS and PFS were made based on microarray expression profiles.

**Survival analysis on RT-qPCR expression profiles.**

In figure S2.2 we report Kaplan-Meier plots for lncRNAs tested by RT-qPCR but that were not significant in either OS or PFS.

All lncRNAs’ OR and CI for training set and validation set are reported in Table S2.3 and S2.4 respectively.

Finally (Table S2.5) we reported also the median expression (IQR) of *miR-200c-3p* in the whole court of patients.

Figure S2.2. KM plots for lncRNAs that were not significant. The figure continues in the next page.

Continue. Figure S2.2. KM plot for lncRNAs that were not significant.

| Overall Survival | | | | | | |
| --- | --- | --- | --- | --- | --- | --- |
|  | Median H | Median L | OR | CI-low | CI-High | p-value |
| *lnc-VSTM2B-9* | 40 | 137 | 1.38 | 0.45 | 4.26 | 0.57 |
| *lnc-SERTAD2-3* | 35 | 138 | 9.33 | 1.92 | 45.32 | 0.00184 |
| *lnc-SOX4-1* | 40 | 138 | 10.82 | 2.24 | 52.29 | 0.00073 |
| *lnc-ST3GAL1-1* | 40 | 138 | 1.38 | 0.45 | 4.22 | 0.57 |
| *lnc-HRCT1-1* | 40 | 139 | 10.5 | 2.17 | 50.81 | 9e-04 |
| *lnc-PHF15-2* | 35 | 138 | 1.14 | 0.36 | 3.58 | 0.82 |
| *lnc-ABCB4-1* | 40 | 138 | 0.52 | 0.17 | 1.63 | 0.26 |
| *lnc-ABCB4-1* | 40 | 138 | 0.72 | 0.24 | 2.22 | 0.57 |
| *lnc-LRIG2-4* | 40 | 139 | 1 | 0.33 | 3.07 | 1 |
| *PVT1* | 40 | 139 | 10.67 | 2.2 | 51.81 | 0.00086 |
| *lnc-RAB40AL-2* | 40 | 139 | 2.68 | 0.81 | 8.82 | 0.1 |
| Progression Free Survival | | | | | | |
|  | Median H | Median L | OR | CI-low | CI-High | p-value |
| *lnc-VSTM2B-9* | 45 | 134 | 1.16 | 0.4 | 3.32 | 0.79 |
| *lnc-SERTAD2-3* | 45 | 135 | 14.76 | 3.07 | 70.97 | 9e-05 |
| *lnc-SOX4-1* | 47 | 135 | 17 | 3.54 | 81.6 | 3e-05 |
| *lnc-ST3GAL1-1* | 47 | 135 | 1 | 0.36 | 2.8 | 1 |
| *lnc-HRCT1-1* | 47 | 136 | 9.54 | 2.47 | 36.9 | 0.00033 |
| *lnc-PHF15-2* | 45 | 135 | 0.83 | 0.29 | 2.39 | 0.74 |
| *lnc-ABCB4-1* | 47 | 135 | 0.23 | 0.07 | 0.72 | 0.01 |
| *lnc-ABCB4-1* | 47 | 135 | 0.31 | 0.1 | 0.95 | 0.04 |
| *lnc-LRIG2-4* | 47 | 137 | 0.75 | 0.26 | 2.15 | 0.6 |
| *PVT1* | 47 | 136 | 9.76 | 2.51 | 37.94 | 3e-04 |
| *lnc-RAB40AL-2* | 45 | 137 | 2.03 | 0.68 | 6.03 | 0.2 |

Table S2.3. Training set OS and PFS details. Median values for PFS and OS (in months) with relative OR and CI for the training set. H means high levels and L means low levels.

| Overall Survival | | | | | | |
| --- | --- | --- | --- | --- | --- | --- |
|  | Median H | Median L | OR | CI-low | CI-High | p-value |
| *lnc-SERTAD2-3* | 60 | 65 | 4.3 | 1.32 | 13.98 | 0.01 |
| *lnc-SOX4-1* | 60 | 65 | 2.26 | 0.79 | 6.51 | 0.13 |
| *lnc-HRCT1-1* | 60 | 65 | 4.3 | 1.32 | 13.98 | 0.01 |
| *PVT1* | 46 | 65 | 5.92 | 1.59 | 21.99 | 0.00387 |
| Progression Free Survival | | | | | | |
|  | Median H | Median L | OR | CI-low | CI-High | p-value |
| *lnc-SERTAD2-3* | 50 | 69 | 7.6 | 2.09 | 27.68 | 0.00061 |
| *lnc-SOX4-1* | 50 | 69 | 2.76 | 0.98 | 7.78 | 0.05 |
| *lnc-HRCT1-1* | 50 | 69 | 12.6 | 2.77 | 57.39 | 9e-05 |
| *PVT1* | 43 | 67 | 54.76 | 3.201 | 936.75 | 0.0057 |

Table S2.4. Validation set OS and PFS details. Median values for PFS and OS (in months) with relative OR and CI for the validation set. H means high levels and L means low levels.

| Relapsers versus non relapsers | | | | |
| --- | --- | --- | --- | --- |
|  | Relapsers | Non Relapsers |  |  |
|  | Median (IQR) | Median (IQR) | R | p |
| *miR-200c-3p* | 39.57  ( 23.42 – 76.53 ) | 118.71  ( 58.59 – 309.74 ) | 0.07 | 5.3e-08 |

Table S2.5. *miR-200c-3p* IQR. For miR-200c-3p the median distribution (IQR) of fluorescence intensity, normalized, unless otherwise stated, is reported for both relapsers (n=47­) and non relapsers (n=153). *p,* is the level of significance according to the two sides Wilcoxon *t* test; R, is the ratio of the median distribution of relapsed compared with non-relapsers.

**Section 3**

**lncRNA subcellular localization.**

In this section we provide a detailed description of lncRNAs’ sub-cellular localization in selected *in vitro* ovarian cancer cell lines used as a model to infer the subcellular localization of previously identified lncRNAs.

**Additional Materials and Methods**

**In vitro cell culture**

In order to study sub-cellular localization of selected lncRNAs, we use five different ovarian carcinoma cell lines originally obtained from American Type Culture Collection: OVCAR8, OVCAR3, A2780, OVCA432 and CAOV3. All the cell lines are routinely grown at 37°C with 5% CO2 in Roswell Park Memorial Institute (RPMI) medium (Life technologies), supplemented with 1% L-glutamine 200 mmol/L (Biowest) and 10% fetal bovine serum (FBS) (Lonza).

**Cell line authentication**

Misidentification and cross-contamination of human and animal cell cultures have confounded results obtained using in vitro models in biomedical research for more than half a century. Therefore, cells were unambiguously authenticated in the work described here. Following the guidelines stipulated by International Cell Line Authentication Committee (ANSI/ATCC ASN-0002-2011), the ovarian carcinoma cell lines used in this study (OVCAR8, OVCAR3, A2780, OVCA432 and CAOV3) were authenticated by genetic profiling using highly discriminative markers represented by polymorphic short tandem repeat (STR) loci, that consist of repetitive sequence elements 3-7 base pairs in length.

The STR analysis workflow consists essentially of three main steps:

1- STR isolation starting from genomic DNA followed by PCR primer amplification and simultaneous fluorescent labeling of ten loci, nine STR loci and Amelogenin for gender identification. (Cell ID System, Promega)

2- Separation and detection of the amplification products by capillary electrophoresis, followed by automated fluorescent DNA sequencing (ABI Prism 310 Genetic Analyzer, Applied Biosystem)

3- Identification of STR alleles using data analysis software (ABI Prism 310 Data Collection Software) and matched against dedicated cell lines databases, commercially available.

**RNA purification from nuclear and cellular sub-fraction**

The nuclear and cytoplasmic RNA extraction was obtained resuspending cellular pellets (~ 9.0x106 cells) in 550 µl of RLN lysis buffer (Tris-HCl ph8 50 mM, NaCl 140 mM, MgCl2 1.5 mM and Triton-100 0.5%). The disruption of the cytoplasmic membranes was implemented repeating the resuspension step three times maintaining the solution on ice. The integrity of the nucleus’ membrane was examined using a fluorescence microscope (Olympus BX60) placing 25 µl of cell lysate and 1 µl of propidum iodide (PI, C27H34I2N4, 25ng/ml) on a solid support. After the cell lysate centrifugation (4°C, 6000g), we conserved the surnatant containing cytoplasmic RNA and we resuspended the cellular pellet in 1 mL of QIAzol lysis reagent (Qiagen) in order to extract nuclear RNA. We purify RNA obtained from nuclear and cytoplasmic fraction using commercial available kit (RNeasy mini kit, Qiagen). Microarray experiments and RT-qPCR validation were performed as previously described in Section 2 (additional Materials and methods).

**Additional Results**

**Whole genome lncRNAs localization.**

We perform microarray profiling of the nuclear enriched transcript fraction and the cytoplasmic enriched fraction extracted from five EOC cell lines. We performed Sam-paired test to find those lncRNAs that are consistently either nuclear or cytoplasmic across all cell lines. Heat maps in Figure S3.1 and S3.2 represent respectively nuclear and cytoplasmic lncRNAs identified.

Figure S3.1 Heatmap nucleus/cytoplasm: nucleus side. Heatmap with log foldChange nucleus/cytoplasm for significant lncRNAs probes (Sam paired test, FDR <= 0.05). Nuclear side. On the left panel in red the distribution of the fold changes shows how the values are bias towards the nucleus (cyan) respect to the cytoplasm (orange). On the x axis the 5 cell lines on the y axis the lncRNAs. On the right of the heatmap we reported interesting lncRNAs names: repeated lncRNA names means that different probes identify the same lncRNAs gene.

Figure S3.2 Heatmap nucleus/cytoplasm: cytoplasm side. Heatmap with log foldChange nucleus/cytoplasm for significant lncRNAs probes (Sam paired test, FDR <= 0.05). Cytoplasm side. On the left panel in red the distribution of the fold changes shows how the values are bias towards the cytoplasm (orange) respect to the nucleus (cyan). On the x axis the 5 cell lines on the y axis the lncRNAs. On the right of the heatmap we reported interesting lncRNAs names: repeated lncRNA names means that different probes identify the same lncRNAs gene.

**RT-qPCR on candidate lncRNAs.**

Focusing on the four lncRNAs associated with the outcome in multivariate analysis, we validated microarray result of *PVT1*, *lnc-SERTAD2-3*, *lnc-SOX4-1* and *lnc-HRCT1-1*. We performed RT-qPCR using nuclear and cytoplasmic enriched fractions independently extracted from all five ovarian carcinoma cell lines. Results are summarized in figure S4.3. Data confirms that *PVT1*, *lnc-SERTAD2-3*, *lnc-SOX4-1* show a predominant nuclear localization suggesting their possible involvement in transcriptional regulation, otherwise *lnc-HRCT1-1* has not a clear localization across the 5 ovarian carcinoma cell lines analyzed.














Figure S3.3. RT-qPCR of lncRNAs on cell lines. Histograms indicating mean with SD for RT-qPCR expression of a) *lnc-SOX4-1*, b) *PVT1,* c) *lnc-SERTAD2-3* and d) *lnc-HRCT1-1* in the cytoplasm (blue) and nucleus (green) in the five ovarian carcinoma cell lines tested.

**Section 4**

**Network construction and analysis.**

In this section we provide a detailed description of every step used to perform network analysis.

**Additional methods**

Putative lncRNA-target co-expression identification has been performed using reverse engineering approach with ARACNE algorithm *(10)* as implemented in parmigene R package *(11)*. We computed the mutual information (MI) between all genes, lncRNAs and miRNAs. We used as MI threshold the 99th percentile (MI >= 0.215) of the null distribution obtained permuting the original dataset. Significant interactions were further considered for pathway analysis.

The pathway knowledgebase were derived from graphite 1.14 *(12)*. KEGG pathways were enriched with miRNA obtained from miRNA-target validated relations present in miRTarBase 2014 *(13)*. These pathways were used both in the hypergeometric test and in the micrographite analysis.

Hypergeometric test was used to select those pathways showing a significant enrichment in lncRNA co-expressed genes. Pathways showing 3 or more lncRNA co-expressed and an enrichment p-value lower than 0.1 were considered potentially impacted by lncRNAs.

For each lncRNA we performed a topological pathway analysis using micrographite pipeline *(7)*. In details, we performed topological analysis on every pathway significantly enriched in lncRNAs co-expressed gene. For each pathway, we extracted the most impacted portions. From the complete list of impacted pathway portions, we selected the top 10 scored signalling portion and built a meta-pathway.

The meta-pathway was re-analysed using the same topological methods to isolate the signalling portions mostly associated with phenotype without any loss of signal due to Kegg pathway boundaries.

**Additional results**

**Reconstructed network analysis.**

Using ARACNE we came up with a network with 13,321 nodes (88 lncRNAs, 234 miRNAs, 12,999 mRNAs) and 1,359,181 edges (58 lncRNA-lncRNA, 223 lncRNA-miRNA, 15,802 lncRNA-mRNA, 1,039 miRNA-miRNA, 29,773 miRNA-mRNA, 1,312,286 mRNA-mRNA).

For each of the four lncRNAs involved in patients’ survival we isolated the first neighbors in the reconstructed network. In table S4.1 are reported the number and type of interactors for each lncRNA.

| *lncRNA* | # interactors | # mRNA | #miRNA | #lncRNA |
| --- | --- | --- | --- | --- |
| *lnc-SOX4-1* | 146 | 141 | 4 | 1 |
| *lnc-SERTAD2-3* | 140 | 136 | 2 | 2 |
| *lnc-HRCT1-1* | 130 | 128 | 1 | 1 |
| *PVT1* | 551 | 537 | 11 | 3 |

Table S4.1. Number of co-expressed interactors for the four lncRNAs.

Among *lnc-SOX4-1* interactors there are mRNAs that code for 2 co-activators (*RBM14*, and *SPEN*) and 7 transcription factors. Examples of transcriptions factors are *IRF7,* J*UND* involved in inflammation and *YY2* related to *YY1*.

Interestingly, according to our network *lnc-SOX4-1* and *lnc-SERTAD2-3* are co-expressed. Among *lnc-SERTAD2-3* co-expressed mRNAs there are 3 genes involved in chromatin remodeling (*SMARCA4* with elicase activity; *KAT6A* and *KAT6B* that are histone acetil-transferase), one transcription cofactor (*SPEN*) and 10 transcription factors. One of them is *TCF7*, mainly expressed in T-cell. It represses the expression of *CTNNB1*.

Regarding *lnc-HRCT1-1*, 10 interactors are transcription factors (like *E2F8* required for cell cycle progression through G1 to S phase) and 7 nuclear cofactors. One of the miRNAs co-expressed with *lnc-HRCT1-1* is *miR-200b-5p*, a member of miR-200 family.

Finally *PVT1* presents the highest number of co-expressed genes. It has 551 co-expressed genes of which 11 are miRNAs, 3 lncRNAs and 537 protein-coding genes. As for the other lncRNAs, we can suggest a role in the nucleus but along with transcriptional regulation 25 interactors are associated to the apoptotic process. A deeper analysis of co-expressed genes revealed that there are 41 transcription factors, 5 genes involved in chromatin remodeling and 10 transcription co-factors.

Among cofactors, we saw genes like *RIP3K, LMO4* and *GREB1*; the first is a component of the tumor necrosis factor receptor-I signaling complex, the second a regulator of transcription and potential oncogene and the latter is an estrogen-responsive gene related to hormone responsive tissues and cancer. Among genes involved in chromatin remodeling we find *HDAC2* and *BNIP3,* an interactor of anti-apoptotic proteins silenced in tumors by DNA methylation.

Among the transcription factors there are *SETDB1*, a histone methyl transferase that regulates gene silencing and repression; *ATF6* an activator of its target genes associated with ER stress response. *ATF6* has been linked to survival for quiescent but not proliferative squamous carcinoma cells. *STAT2* involved in inflammation responses. *YY1* that either repress or activate promoters and triggers also histone modifications. *TERF2* is a telomeric nucleoprotein complex that negatively regulates the length of telomers in metaphase. *NFATC3* regulates gene expression in T-cell.

*PEG3* plays role in cell proliferation and p53-mediated apoptosis and show tumor suppressor activity in glioma and ovarian cell lines. *HOPX* is a transcription factor that is not repressed in tumor cell line and tissues. *EGR1* is required for differentiation and mitogenesis. *TFE3* promotes the expression of genes downstream the TGF-B signaling and may be involved in chromosomal translocation in renal cell carcinomas and other cancers. *HMGB3* is an important factor to maintain stem-cell populations and an aberrant expression has been found in tumor cells.

**Micrographite analysis results.**

We analyzed expression profiles of miRNAs and mRNAs using micrographite pipeline *(7)*. We found that overrepresented pathways, related to the 548 (protein coding and miRNAs) co-expressed genes with *PVT1*, are key players in cancer such as *PI3K-Akt*, cell cycle, and MAPK signaling pathways. All the previously mentioned pathways contain *MYC* gene (4609 Entrez Gene ID).

To extract the portion of each pathway mostly involved in the phenotype and to combine them we run micrographite *(7)* on the pathways enriched in lncRNA interactions. We obtained a final network called meta-pathway of 208 protein-coding genes and 58 miRNAs. On this meta-pathway we identified the portion of the network mostly associated to the phenotype. This pipeline has the unprecedented power to analyze gene-relation without the pathway-edge constrains. In particular, we were able to extend those chains of biological signals that are relevant for EOC stage I without pathways definition constrains.

We compared the expression profiles of patients with good and bad prognosis according to *PVT1* expression profile (lower/greater than the median value of *PVT1*).

This analysis results in 4 different paths that run through the metapathway. Given the high score we kept both the first and the second paths and merged them.

Figure S4.1 represents the fusion of the two most impacted portions of the meta-pathway associated to the prognosis. Among the elements of this path we evidenced 67 protein-coding genes (in the network Figure S4.1 we collapse groups or complexes thus there are 38 nodes) of which 5 are putative interactors of *PVT1* and 23 are miRNAs.

We can see a chain of protein coding genes, from *EGFR/ERBB2*, moving through *CTNND1, CDC42, PI3K* family (*PIK3R5; PIK3CA; PIK3CB; PIK3CD; PIK3CG; PIK3R1; PIK3R2; PIK3R3*) and ending in *TRAF2*, a mediator of the anti-apoptotic signal from TNF receptors.

To further strength the importance of the network, two genes of the chain are putative interactors of *PVT1* (*EGFR/ERBB*” and *TRAF2*), while the signal transducer *CTNND1* interacts with MYC according to BioGRID interactome *(14)*. The second important portion of the meta-pathway goes around the duo *TNFRSF1A* - *TRAF2* brought the signal to *PI3K/AKT*, *MAPK* kinases and *IKBKG* (alias *NEMO*).

It is worth to mention the complete activation of the chain *TNFRSF1A*, *TRAF2*, *PI3K* and *AKT* that directly points to cell cycle and proliferation. On the other hand, there is the activation of MAPK signaling pathway and the patients with the worst prognosis has the activation of *NEMO* that is the key player of the SUMOylation. Among the plethora of SUMOylation function, the conjugation of SUMO protein is able to affect protein function and cellular localization *(15)*. As an example it has been demonstrate that TNF induces the desumoylation of transcription factors that regulates apoptosis or differentiation *(16)*.

*lnc-SOX4-1* has a smaller number of co-expressed genes than *PVT*1. *lnc-SOX4-1* is transcribed from a cancer-associated locus *(17)* and we confirmed that this locus was associated with patients’ survival also in EOC stage I. We build its meta-pathway with micrographite. The resulting meta-pathway consisted of 256 protein-coding genes and 52 miRNAs. In this meta-pathway the analysis highlighted only one major way (Figure S4.2). This portion composed by 65 protein-coding genes (in the network Figure S4.2 we report 20 nodes because we grouped complexes or families like NFAT) and 19 miRNAs leads to the activation of two important transcription factors, NFAT complex and *FOS/JUN*. Both of these transcription factors lead to pro-inflammatory responses (activation of *CCL3*) and are known to sustain cancer metastasis *(18)*. In this network, *lnc-SOX4-1* has only one co-expressed gene, *MYD88* known to be able to link inflammation, DNA repair and cancer *(19)*. What is more even interesting is the up-regulation of *TGFβ*. *TGFβ* is able to induce *PVT1* expression. *PVT1* can associate with *NOP2* promoting cell cycle, proliferation and TGF-B signaling pathway (20–22).

No enriched pathways were found for *lnc-SERTAD2-3.*

Figure S4.1. *PVT1* based network. The network represents the 2 most impacted meta-pathway portions (from now on referred as “ways”) according to micrographite run on the meta-pathway of *PVT1*. The 2 most impacted ways have a common core of genes (in the network the nodes with the yellow border). The ending portion of each way is specific: nodes with green border belong only to the first way where *WASF1/2* and *ACTB* are the main actors; nodes with blue border belong exclusively to the second way and *MAPK8* and *AKT1/2/3* are the key elements. Genes/nodes are painted according to their fold change from blue to red (for groups we choose the greatest fold change in absolute value among the group). Blue means a gene expressed in the patients with low *PVT1* expression hence with better survival; red means gene expressed in patients with high *PVT1* expression hence with poor prognosis. Red arrows represent a co-expression interaction between the pointed node (or one of its members) and *PVT1.* These interactions are retrieved from our network reconstruction approach. Green arrows represent a protein-protein interaction between the pointed node and *MYC*. The list of MYC interactors was retrieved from BioGrid database.

Figure S4.2. *lnc-SOX4-1* based network. The network represents the most impacted portion of the *lnc-SOX4-1* meta-pathway according to micrographite. Genes/nodes are painted according to their fold change from blue to red (for groups we choose the greatest fold change in absolute value among the group). Blue means a gene expressed in the patients with low *lnc-SOX4-1* expression hence with better survival; red mean gene expressed in patients with high *lnc-SOX4-1* expression hence poor prognosis. Yellow arrow represents a co-expression interaction between the pointed node (or one of its members) and *lnc-SOX4-1.* Red arrows represent a co-expression interaction between the pointed node (or one of its members) and *PVT1*. Yellow and red arrows interactions are retrieved from our network reconstruction approach. Green arrows represent a protein protein interaction between the pointed node and MYC. The list of MYC interactors was retrieved from BioGrid database

.­

**Section 5**

***PVT1* locus amplification.**

In this section, we analyze whether increased expression levels of *PVT1* was related to genomic amplification of the 8q24 genomic region.

**Additional Materials and Methods**

**Patients cohort.** We analyze a subset of 90 biopsies selected from the entire cohort of 202 stage I tumor biopsies enrolled in the study (Supplementary Section S1). We selected 43 patients who relapsed (47%) and 47 patients (53%) who did not relapsed keeping histological and clinical parameters well balanced.

**Copy number variation assay.** Copy number variation analysis of PVT1 and *cMYC* locus gene was performed by droplet digital PCR (ddPCR QX200TM Droplet DigitalTM PCR System, Bio-Rad, Hercules, California USA) in multiplex reaction. Two reference genes (*TERT* and *EIF2C1*, 20X Dye Quencher 5’ HEX, Bio-Rad) were used for data normalization. PCR reaction was performed in a final volume of 20 µl with the following components (Bio-Rad, Hercules, California USA): 10 µl ddPCRTM Supermix for probes (no dUTPs) 2X, 0.8 µl PrimePCR ddPCR Copy Number Assay *TERT* 20X, 0.5 µl PrimePCR ddPCR Copy Number Assay *EIF2C1* 20X, 0.7 µl PrimePCR ddPCR Copy Number Assay PVT1 (Dye Quencher 5’ FAM) 20X, 8 µl DNase/ RNase free- water and 1 µl of extracted DNA [5 ng/µl]. PCR specific thermal cycling conditions were 95° for 5 minutes, 95°C for 30 seconds and 59°C for 1 minute for 40 cycles, 98° for 10 minutes (ramping temperature 2°C/ sec). Final detection and data analysis were made by ddPCR QXTM Droplet DigitalTM PCR System (Bio-Rad, Hercules, California USA).

**Additional Results**

After *PVT1* copy number variation analysis, we subdivided the 90 patients tested in four groups basing on the *PVT1* copy number (1, 2, 3 or >4) . In Figure S5.1 boxplots show that the four groups of patients have no differences in expression of *PVT1*, suggesting that the increased expression of *PVT1* in patients characterized by poor prognosis is not due to its locus amplification.


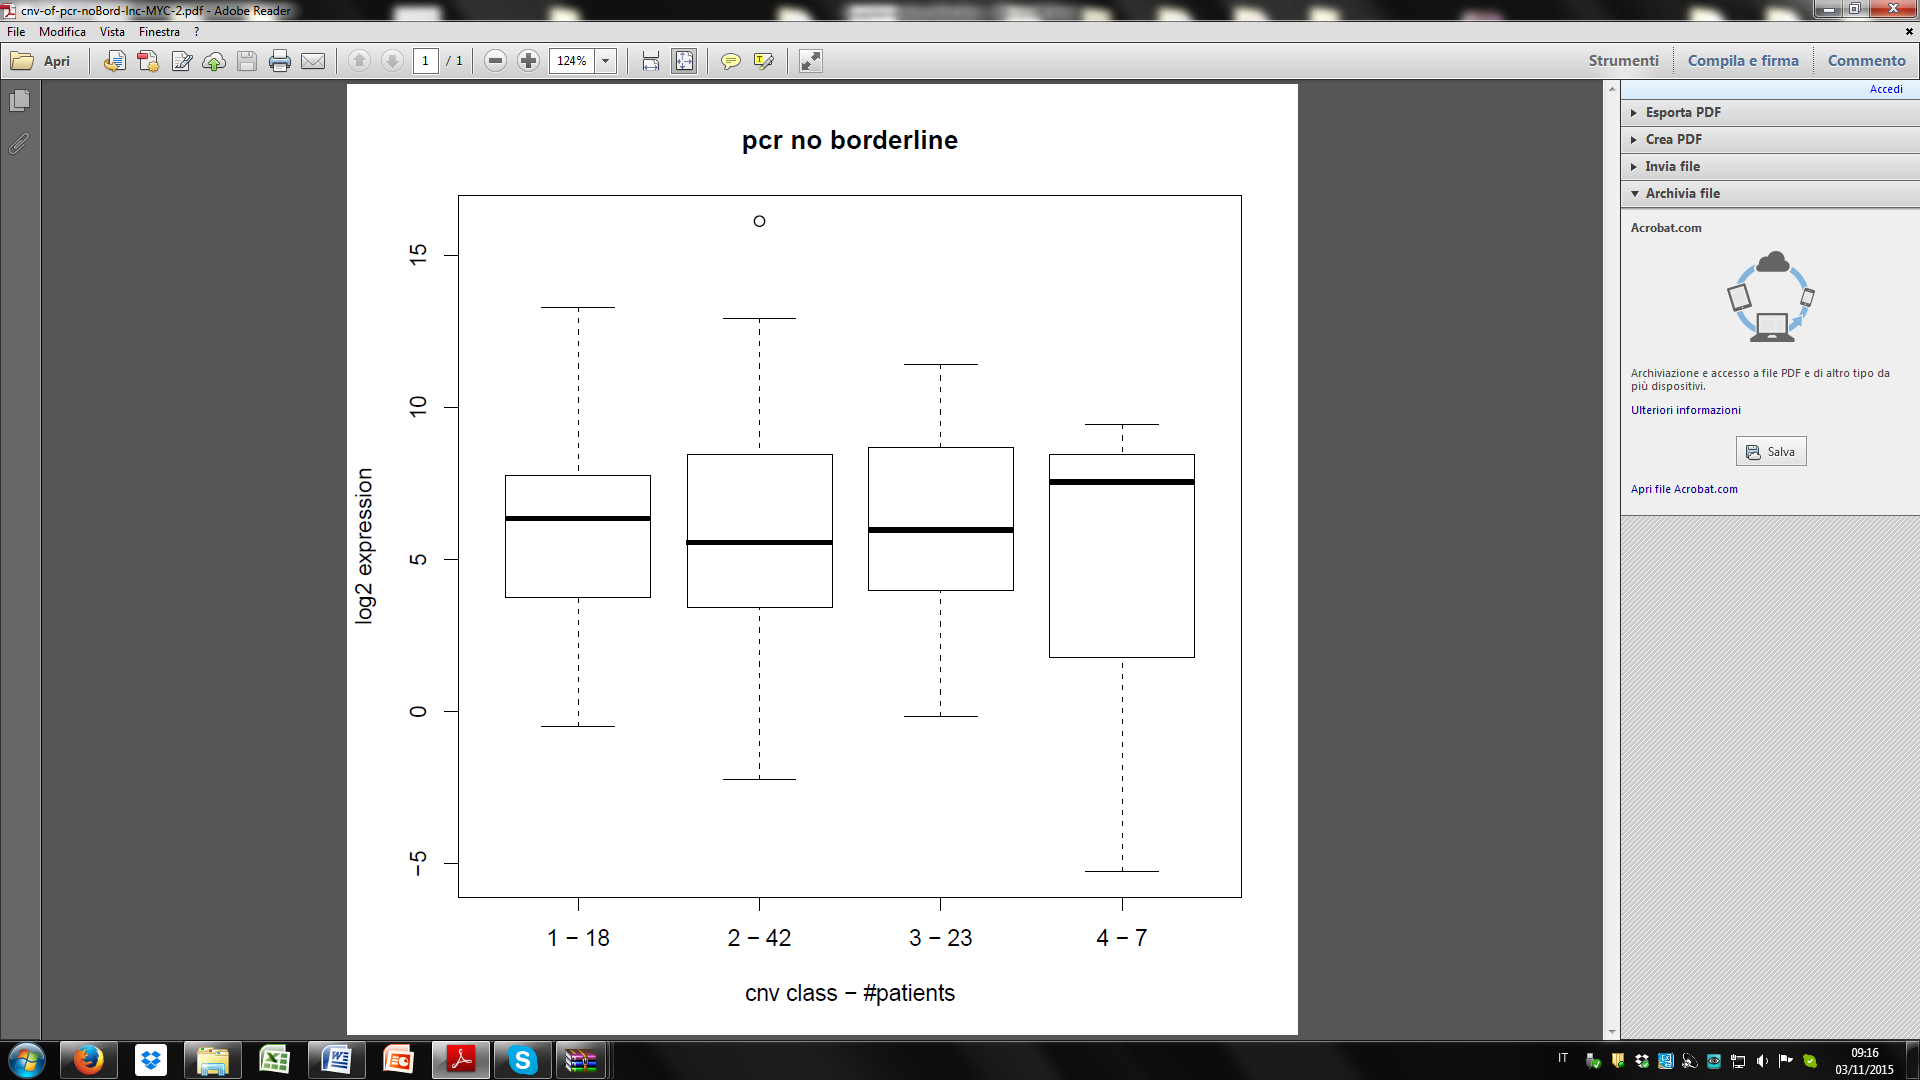


Figure S5.1 Box plots with expression levels of *PVT1* related to its copy number. Box plots showing median, IRQ, 1.5 interquartile range (error bars) and outliers of expression levels (log2 expression) of *PVT1*. On the x-axis are reported the four groups of patients: the first number represents the copy number of *PVT1* (4 means 4 or more) and the second one represents the number of patients within each group.

**References**

1. Calura E, Fruscio R, Paracchini L, Bignotti E, Ravaggi A, Martini P, et al. miRNA landscape in stage I epithelial ovarian cancer defines the histotype specificities. Clin Cancer Res. 2013;19:4114–23.

2. Calura E, Paracchini L, Fruscio R, Di Feo A, Ravaggi A, Peronne J, et al. A prognostic regulatory pathway in stage I Epithelial Ovarian Cancer: new hints for the poor prognosis assessment. Ann Oncol. 2016;mdw210.

3. Marchini S, Cavalieri D, Fruscio R, Calura E, Garavaglia D, Nerini IF, et al. Association between miR-200c and the survival of patients with stage I epithelial ovarian cancer: a retrospective study of two independent tumour tissue collections. Lancet Oncol. 2011;12:273–85.

4. Bolstad BM, Irizarry RA, \AAstrand M, Speed TP. A comparison of normalization methods for high density oligonucleotide array data based on variance and bias. Bioinformatics. 2003;19:185–93.

5. Cunningham F, Amode MR, Barrell D, Beal K, Billis K, Brent S, et al. Ensembl 2015. Nucleic Acids Res. 2015;43:D662–9.

6. Volders P-J, Helsens K, Wang X, Menten B, Martens L, Gevaert K, et al. LNCipedia: a database for annotated human lncRNA transcript sequences and structures. Nucleic Acids Res. 2013;41:D246–51.

7. Calura E, Martini P, Sales G, Beltrame L, Chiorino G, D’Incalci M, et al. Wiring miRNAs to pathways: a topological approach to integrate miRNA and mRNA expression profiles. Nucleic Acids Res. 2014;gku354.

8. Calura E, Fruscio R, Paracchini L, Bignotti E, Ravaggi A, Martini P, et al. miRNA landscape in stage I epithelial ovarian cancer defines the histotype specificities. Clin Cancer Res. 2013;19:4114–23.

9. Marchini S, Cavalieri D, Fruscio R, Calura E, Garavaglia D, Nerini IF, et al. Association between miR-200c and the survival of patients with stage I epithelial ovarian cancer: a retrospective study of two independent tumour tissue collections. Lancet Oncol. 2011;12:273–85.

10. Margolin AA, Nemenman I, Basso K, Wiggins C, Stolovitzky G, Favera RD, et al. ARACNE: an algorithm for the reconstruction of gene regulatory networks in a mammalian cellular context. BMC Bioinformatics. 2006;7:S7.

11. Sales G, Romualdi C. parmigene—a parallel R package for mutual information estimation and gene network reconstruction. Bioinformatics. 2011;27:1876–7.

12. Sales G, Calura E, Cavalieri D, Romualdi C. graphite-a Bioconductor package to convert pathway topology to gene network. BMC Bioinformatics. 2012;13:20.

13. Hsu S-D, Tseng Y-T, Shrestha S, Lin Y-L, Khaleel A, Chou C-H, et al. miRTarBase update 2014: an information resource for experimentally validated miRNA-target interactions. Nucleic Acids Res. 2014;42:D78–85.

14. Stark C, Breitkreutz B-J, Reguly T, Boucher L, Breitkreutz A, Tyers M. BioGRID: a general repository for interaction datasets. Nucleic Acids Res. 2006;34:D535–9.

15. Yeh ET. SUMOylation and De-SUMOylation: wrestling with life’s processes. J Biol Chem. 2009;284:8223–7.

16. Li X, Luo Y, Yu L, Lin Y, Luo D, Zhang H, et al. SENP1 mediates TNF-induced desumoylation and cytoplasmic translocation of HIPK1 to enhance ASK1-dependent apoptosis. Cell Death Differ. 2008;15:739–50.

17. Maris JM, Mosse YP, Bradfield JP, Hou C, Monni S, Scott RH, et al. Chromosome 6p22 locus associated with clinically aggressive neuroblastoma. N Engl J Med. 2008;358:2585–93.

18. Yoeli-Lerner M, Yiu GK, Rabinovitz I, Erhardt P, Jauliac S, Toker A. Akt blocks breast cancer cell motility and invasion through the transcription factor NFAT. Mol Cell. 2005;20:539–50.

19. Kfoury A, Le Corf K, El Sabeh R, Journeaux A, Badran B, Hussein N, et al. MyD88 in DNA repair and cancer cell resistance to genotoxic drugs. J Natl Cancer Inst. 2013;105:937–46.

20. Colombo T, Farina L, Macino G, Paci P. PVT1: A Rising Star among Oncogenic Long Noncoding RNAs. BioMed Res Int. 2015;2015.

21. Paci P, Colombo T, Farina L. Computational analysis identifies a sponge interaction network between long non-coding RNAs and messenger RNAs in human breast cancer. BMC Syst Biol. 2014;8:83.

22. Wang F, Yuan J-H, Wang S-B, Yang F, Yuan S-X, Ye C, et al. Oncofetal long noncoding RNA PVT1 promotes proliferation and stem cell-like property of hepatocellular carcinoma cells by stabilizing NOP2. Hepatology. 2014;60:1278–90.
